# Supplementary material
Source: HighWire-hosted journal article supplement (https://bmjopen.bmj.com/content/11/9/e043253)
Supplement: inline-supplementary-material-1 [file inline-supplementary-material-1.pdf]

**Supplementary Table 1: APA (Age, Previous Stroke and ACR) Score derivation**

|                               | Variable                                      | Value |
|-------------------------------|-----------------------------------------------|-------|
| <b>Age</b>                    | ≥80 years                                     | 1     |
| <b>Previous stroke or TIA</b> | Present                                       | 1     |
| <b>ACR</b>                    | ≥3.5 mg/mmol for women<br>≥2.5 mg/mol for men | 1     |

|              |          |           |
|--------------|----------|-----------|
| <b>Score</b> | 0-1      | 2-3       |
| <b>Risk</b>  | Low Risk | High Risk |

ACR: Albumin Creatinine Ratio

**Supplementary Table 2:** Occurrence of major adverse cardiac events (MACE) by APA risk score group (p for Chi-Squared)

| <b>APA score</b> | <b>N</b> | <b>Occurrence of MACE events (%)</b> |
|------------------|----------|--------------------------------------|
| <b>0</b>         | 1215     | 4.9                                  |
| <b>1</b>         | 770      | 7.0                                  |
| <b>2</b>         | 207      | 11.6                                 |
| <b>3</b>         | 10       | 30                                   |
|                  |          | P<0.001                              |

## Supplementary Table 3

The predictive values of the elements of the APA score compared to the total score in the study and the validation population.

Table 3a The predictive values in the original study population

|                                   | PPV   | NPV   | Sensitivity | Specificity |
|-----------------------------------|-------|-------|-------------|-------------|
| Aged >80 years                    | 7.9%  | 94.2% | 32.1%       | 74.7%       |
| Previous Stroke                   | 11.9% | 93.9% | 7.1%        | 96.4%       |
| Age >80 years and Previous Stroke | 8.4%  | 94.5% | 37.9%       | 72.1%       |
| APA score $\geq 2$                | 12.4% | 94.6% | 19.3%       | 91.2%       |

Table 3b The predictive values in the validation population

|                                   | PPV   | NPV   | Sensitivity | Specificity |
|-----------------------------------|-------|-------|-------------|-------------|
| Aged >80 years                    | 9.8%  | 91.3% | 38.5%       | 64.6%       |
| Previous Stroke                   | 18.2% | 93.6% | 46.2%       | 79.2%       |
| Age >80 years and Previous Stroke | 13.3% | 91.4% | 15.4%       | 90.0%       |
| APA score $\geq 2$                | 24.4% | 96.9% | 76.9%       | 75.4%       |

PPV Positive Predictive Value

NPV Negative Predictive Value

APA Composite of Age >80 years, Previous stroke, elevated ACR. A score of 2 or 3 are regarded as high risk
